# Supplementary material
Source: publisher figshare collection journal article supplement (https://tandf.figshare.com/ndownloader/files/17869985)
Supplement: Supplementary file 1 [file 17869985]

**Supplement 1.** Factors associated with IV-tPA receipt among all patients in multivariate model: pooled results of select multiply imputated data.

| **Covariate** | **Estimate**  **(95% Confidence Interval)** | **p-value** |
| --- | --- | --- |
| Arrival by EMS | 1.62  (1.21,2.16) | <0.01 |
| National Institutes of Health Stroke Scale | 1.10  (1.07,1.12) | <0.01 |
| Calendar Year of Admission | 1.04  (0.91,1.19) | <0.48 |
| Last Known Well to ED Arrival | 0.48  (0.44,0.52) | <0.01 |
| ED Arrival to CT Imaging | 0.14  (0.08,0.24) | <0.01 |
| Health Insurance  (reference=Private) |  |  |
| *Medicare* | 1.24  (0.96,1.59) | <0.08 |
| *Medicaid* | 0.55  (0.38,0.79) | <0.01 |
| *No Insurance* | 2.21  (1.17,4.16) | <0.01 |
| Age Group  (reference=18-44 Years) |  |  |
| *45-54 Years* | 1.03  (0.52,2.03) | <0.92 |
| *55-64 Years* | 0.57  (0.31,1.05) | <0.07 |
| *65+ Years* | 0.31  (0.17,0.55) | <0.01 |
| Race/ Ethnicity  (reference=White, Non-Hispanic) |  |  |
| *Black, Non-Hispanic* | 1.30  (0.88,1.92) | <0.18 |
| *Asian, Non-Hispanic* | 2.00  (1.14,3.53) | <0.01 |
| *Hispanic* | 1.47  (0.86,2.49) | <0.15 |
| *Other, Non-Hispanic* | 1.26  (0.72,2.20) | <0.40 |
| Sex (Female) | 0.82  (0.67,1.01) | <0.06 |
| Pre or In-Hospital Delay | 0.11  (0.06,0.21) | <0.01 |

EMS = emergency medical services; ED = emergency department; CT = computed tomography.

*We imputed NIH stroke scale, last known well to ED arrival, and ED arrival to CT imaging in the full patient cohort using fully conditional specification methods with predictive mean matching. We used several imputation models by varying covariates used for imputation. Reported here are select results.

**Supplement 2.** Factors associated with IV-tPA receipt among patients arriving by EMS in multivariate model: pooled results of select multiply imputated data.

| **Covariate** | **Estimate**  **(95% Confidence Interval)** | **p-value** |
| --- | --- | --- |
| EMS Prenotification | 2.55  (1.90,3.43) | <0.01 |
| National Institutes of Health Stroke Scale | 1.08  (1.06,1.11) | <0.01 |
| Calendar Year of Admission | 0.91  (0.78,1.06) | <0.25 |
| Last Known Well to ED Arrival | 0.48  (0.43,0.52) | <0.01 |
| ED Arrival to CT Imaging | 0.21  (0.12,0.38) | <0.01 |
| Health Insurance (ref=Private) |  |  |
| *Medicare* | 1.09  (0.82,1.46) | <0.52 |
| *Medicaid* | 0.57  (0.37,0.86) | <0.01 |
| *No Insurance* | 1.87  (0.85,4.11) | <0.11 |
| Age Group (ref=18-44 Years) |  |  |
| *45-54 Years* | 0.76  (0.30,1.91) | <0.56 |
| *55-64 Years* | 0.43  (0.19,0.97) | <0.04 |
| *65+ Years* | 0.24  (0.11,0.53) | <0.01 |
| Race/ Ethnicity (ref=White, Non-Hispanic) |  |  |
| *Black, Non-Hispanic* | 1.45  (0.92,2.29) | <0.10 |
| *Asian, Non-Hispanic* | 2.17  (1.08,4.33) | <0.02 |
| *Hispanic* | 1.43  (0.77,2.65) | <0.24 |
| *Other, Non-Hispanic* | 1.17  (0.61,2.25) | <0.62 |
| Sex (Female) | 0.77  (0.60,0.99) | <0.04 |
| Pre or In-Hospital Delay | 0.13  (0.07,0.26) | <0.01 |

EMS = emergency medical services; ED = emergency department; CT = computed tomography.

*We imputed NIH stroke scale, last known well to ED arrival, and ED arrival to CT imaging in the full patient cohort using fully conditional specification methods with predictive mean matching. We used several imputation models by varying covariates used for imputation. Reported here are select results.
